# Supplementary material for: Classification of Amyloidosis by Model-Assisted Mass Spectrometry-Based Proteomics
Source: MDPI journal article supplement (doi:10.3390/ijms23010319), 2021-12-28
Supplement: s1 [file s1]

**Supplementary Table S1. Number of samples included in study organized by tissue origins.**

| <b>Organ/Tissue</b> | <b>Training</b> | <b>Test</b> | <b>Validation</b> |
|---------------------|-----------------|-------------|-------------------|
|                     | CR+/CR-         | CR+/CR-     | CR+               |
| Bone                | 8/12            | 2/5         | 9                 |
| GIM                 | 11/13           | 3/5         | 0                 |
| Heart               | 14/14           | 5/6         | 5                 |
| Kidney              | 8/10            | 6/6         | 6                 |
| Lung                | 6/4             | 4/          | 4                 |
| Others              |                 |             | 22                |
| Skin                | 6/2             | 2/1         | 10                |
| Synovial            |                 |             | 35                |
| Tenosynovial        |                 |             | 12                |
| Total               | 53/55           | 22/23       | 103               |

**Supplementary Table S3. Result from training data set of disease-state classification**

Support Vector Machine algorithm was developed based on the quantitative readout (number of peptide spectrum matches) of each of the identified amyloid signature protein (Table 1) from the proteomics analysis of the biopsies from the training set. The training data set consisted of 53 amyloid-containing biopsies ("+" ) and 55 corresponding controls without amyloid ("-").

| <b>Signature protein</b>     | <b>Correct/Total</b> | <b>Sensitivity</b> | <b>Specificity</b> | <b>PPV</b> | <b>NPV</b> | <b>Accuracy</b> |
|------------------------------|----------------------|--------------------|--------------------|------------|------------|-----------------|
| ApoA4                        | +: 51/53<br>-: 52/55 | 0.96               | 0.95               | 0.94       | 0.96       | 0.95            |
| ApoE                         | +: 45/53<br>-: 49/55 | 0.85               | 0.89               | 0.88       | 0.86       | 0.87            |
| SAP                          | +: 50/53<br>-: 55/55 | 0.94               | 1.00               | 1.00       | 0.95       | 0.97            |
| Clusterin                    | +: 52/53<br>-: 55/55 | 0.98               | 1.00               | 1.00       | 0.98       | 0.99            |
| Vitronectin                  | +: 22/53<br>-: 55/55 | 0.42               | 1.00               | 1.00       | 0.64       | 0.71            |
| Complement C9                | +: 8/53<br>-: 55/55  | 0.15               | 1.00               | 1.00       | 0.55       | 0.58            |
| Collagen alpha-1(VI) chain   | +: 40/53<br>-: 50/55 | 0.75               | 0.91               | 0.89       | 0.79       | 0.83            |
| Collagen alpha-2(VI) chain   | +: 37/53<br>-: 48/55 | 0.70               | 0.87               | 0.84       | 0.75       | 0.79            |
| Collagen alpha-3(VI) chain   | +: 41/53<br>-: 46/55 | 0.77               | 0.84               | 0.82       | 0.79       | 0.81            |
| Fibulin-1                    | +: 25/53<br>-: 55/55 | 0.47               | 1.00               | 1.00       | 0.66       | 0.74            |
| ApoA4+ApoE                   | +: 52/53<br>-: 54/55 | 0.98               | 0.98               | 0.98       | 0.98       | 0.98            |
| + Clusterin                  | +: 53/53<br>-: 55/55 | 1.00               | 1.00               | 1.00       | 1.00       | 1.00            |
| + Vitronectin                | +: 52/53<br>-: 54/55 | 0.98               | 0.98               | 0.98       | 0.98       | 0.98            |
| + Complement C9              | +: 53/53<br>-: 54/55 | 1.00               | 0.98               | 0.98       | 1.00       | 0.99            |
| + Collagen alpha-1(VI) chain | +: 52/53<br>-: 54/55 | 0.98               | 0.98               | 0.98       | 0.98       | 0.98            |

|                              |                      |      |      |      |      |      |
|------------------------------|----------------------|------|------|------|------|------|
| + Collagen alpha-2(VI) chain | +: 53/53<br>-: 55/55 | 1.00 | 1.00 | 1.00 | 1.00 | 1.00 |
| + Collagen alpha-3(VI) chain | +: 52/53<br>-: 54/55 | 0.98 | 0.98 | 0.98 | 0.98 | 0.98 |
| + Fibulin-1                  | +: 53/53<br>-: 55/55 | 1.00 | 1.00 | 1.00 | 1.00 | 1.00 |
| ApoA4+ApoE+SAP               | +: 53/53<br>-: 55/55 | 1.00 | 1.00 | 1.00 | 1.00 | 1.00 |
